# Supplementary material for: Proteolysis-Dependent Remodeling of the Tubulin Homolog FtsZ at the Division Septum in Escherichia coli
Source: PubMed Central journal article supplement (PMC5256927; doi:10.1371/journal.pone.0170505), 2017-01-23

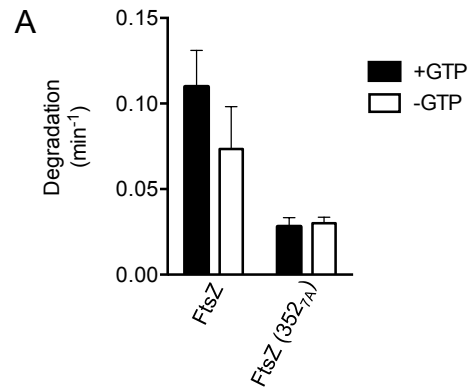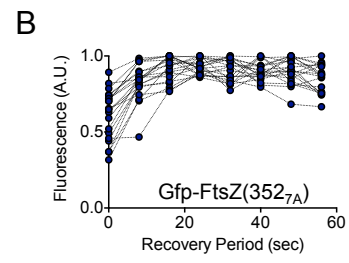

Supplement: pone.0170505.s005.pdf [file pone.0170505.s005.pdf]
