# Supplementary material for: Proteolysis-Dependent Remodeling of the Tubulin Homolog FtsZ at the Division Septum in Escherichia coli
Source: PubMed Central journal article supplement (PMC5256927; doi:10.1371/journal.pone.0170505), 2017-01-23
Supplement: pone.0170505.s007.pdf [file pone.0170505.s007.pdf]

| Strain or plasmid                | Relevant Genotype    | Average cell length <sup>a</sup> (μm) | Fluor. Recovery Average t <sub>1/2</sub> (sec) <sup>b</sup> | p value <sup>c</sup> |
|----------------------------------|----------------------|---------------------------------------|-------------------------------------------------------------|----------------------|
| <b>Host Strain + pGfp-FtsZ</b>   |                      |                                       |                                                             |                      |
| JC0390                           | <i>wild type</i>     | 3.5 ± 0.1                             | 6.2 ± 0.5 (n=18)                                            | -                    |
| JC0394                           | <i>ΔclpX</i>         | 3.1 ± 0.1                             | 10.6 ± 1.3 (n=38)                                           | 0.0037               |
| MV0210                           | <i>ΔclpP</i>         | 3.0 ± 0.1                             | 10.6 ± 0.7 (n=27)                                           | <0.0001              |
| MV0256                           | <i>clpP(S97A)</i>    | 2.7 ± 0.04                            | 10.4 ± 1.4 (n=30)                                           | 0.0072               |
| JC0395                           | <i>ΔminC</i>         | 6.1 ± 0.2                             | 10.3 ± 1.2 (n=20)                                           | 0.0049               |
| MV0198                           | <i>ΔslmA</i>         | 4.4 ± 0.2                             | 11.2 ± 1.7 (n=22)                                           | 0.0091               |
| MV0277                           | <i>ΔzapE</i>         | 4.3 ± 0.1                             | 9.2 ± 0.8 (n=18)                                            | 0.0048               |
| MV03722                          | <i>clpX-restored</i> | n.d.                                  | 8.2 ± 1.4 (n=8)                                             | n.s.                 |
| MV03712                          | <i>clpP-restored</i> | n.d.                                  | 8.1 ± 0.6 (n=11)                                            | n.s.                 |
| MV03732                          | <i>minC-restored</i> | n.d.                                  | 6.7 ± 1.1 (n=9)                                             | n.s.                 |
| <b>MG1655 (JC0390) + plasmid</b> |                      |                                       |                                                             |                      |
| pGfp-FtsZ(G105S)                 |                      | 4.0 ± 0.1                             | 12.6 ± 1.5 (n=25)                                           | 0.0003               |
| pGfp-FtsZ(R379E)                 |                      | 9.6 ± 0.6                             | 12.1 ± 1.6 (n=26)                                           | 0.0013               |
| pGfp-FtsZ(352 <sub>7A</sub> )    |                      | n.d.                                  | 8.2 ± 1.1 (n=18)                                            | n.s.                 |
| pGfp-FtsZ(G105S, R379E)          |                      | > 10 μm                               | 13.8 ± 2.3 (n=18)                                           | 0.0041               |
| <b>BW27784 zipA-gfp</b>          |                      |                                       |                                                             |                      |
| MC181                            |                      | 5.4 ± 0.1                             | 5.8 ± 0.6 (n=21)                                            |                      |
| MV0226                           | <i>ΔclpX</i>         | 4.3 ± 0.1                             | 5.8 ± 0.5 (n=23)                                            |                      |

<sup>a</sup> Average cell length was calculated by measuring a minimum of 200 cells; 'n.d.' is not determined.

<sup>b</sup> Error values are reported as SEM.

<sup>c</sup> p values for each data set compared to wild type strain JC0390 expressing Gfp-FtsZ were calculated by Welch's t test. A p value >0.01 was not significant (n.s.).
